# Supplementary material
Source: publisher figshare collection journal article supplement (https://acs.figshare.com/ndownloader/files/3763306)
Supplement: Supplementary file 1 [file 3763306]

## Supporting Information

# Reduction of Acute Inflammatory Effects of Fumed Silica Nanoparticles in the Lung by Adjusting Silanol Display through Calcination and Metal Doping

Bingbing Sun,<sup>†</sup> Suman Pokhrel,<sup>‡</sup> Darren R. Dunphy,<sup>§</sup> Haiyuan Zhang,<sup>||</sup> Zhaoxia Ji,<sup>⊥</sup>  
Xiang Wang,<sup>⊥</sup> Meiyang Wang,<sup>†</sup> Yu-Pei Liao,<sup>†</sup> Chong Hyun Chang,<sup>⊥</sup> Juyao Dong,<sup>#</sup> Ruibin  
Li,<sup>†</sup> Lutz Mädler,<sup>‡</sup> C. Jeffrey Brinker,<sup>§,¶,▲</sup> André E. Nel,<sup>\*,†,⊥</sup> and Tian Xia<sup>\*,†,⊥</sup>

<sup>†</sup>Division of NanoMedicine, Department of Medicine, <sup>⊥</sup>California NanoSystems Institute, and <sup>#</sup>Department of Chemistry, University of California, Los Angeles, California 90095, United States, <sup>‡</sup>Foundation Institute of Materials Science (IWT), Department of Production Engineering, University of Bremen, 28359 Bremen, Germany, <sup>§</sup>Department of Chemical and Nuclear Engineering, and <sup>¶</sup>Department of Molecular Genetics and Microbiology, University of New Mexico, Albuquerque, New Mexico 87131, United States, <sup>||</sup>Laboratory of Chemical Biology, Changchun Institute of Applied Chemistry, Chinese Academy of Sciences, Changchun, 130022, Jilin, China, and <sup>▲</sup>Self-Assembled Materials Department, Sandia National Laboratories, P.O. Box 5800 MS1349, Albuquerque, New Mexico 87185, United States

\* Address correspondence to  
txia@ucla.edu  
anel@mednet.ucla.edu

**Figure S1**

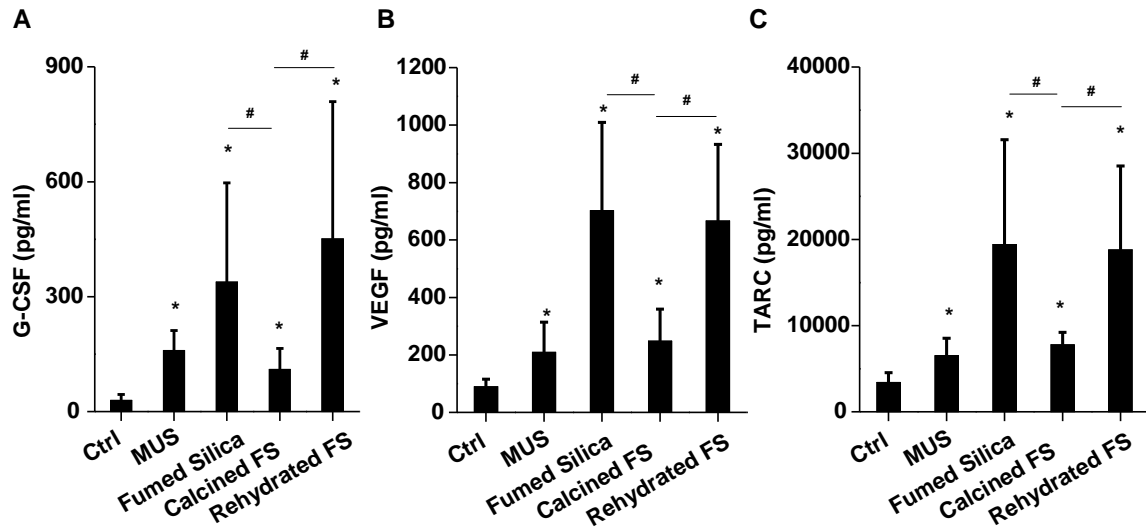

**Figure S1. Reduced silanol display by calcination decreased fumed silica-induced inflammation in mice lung, which was exacerbated by rehydration.** *wt* C57BL/6 (n=6) mice were exposed to 1.6 mg/kg of different fumed silica nanoparticles by oropharyngeal aspiration. BAL fluid was collected to determine (A) G-CSF, (B) VEGF, and (C) TARC level at 40 h. \* $p < 0.05$  compared to control mice. # $p < 0.05$  compared to calcined fumed silica-treated mice.

Figure S2

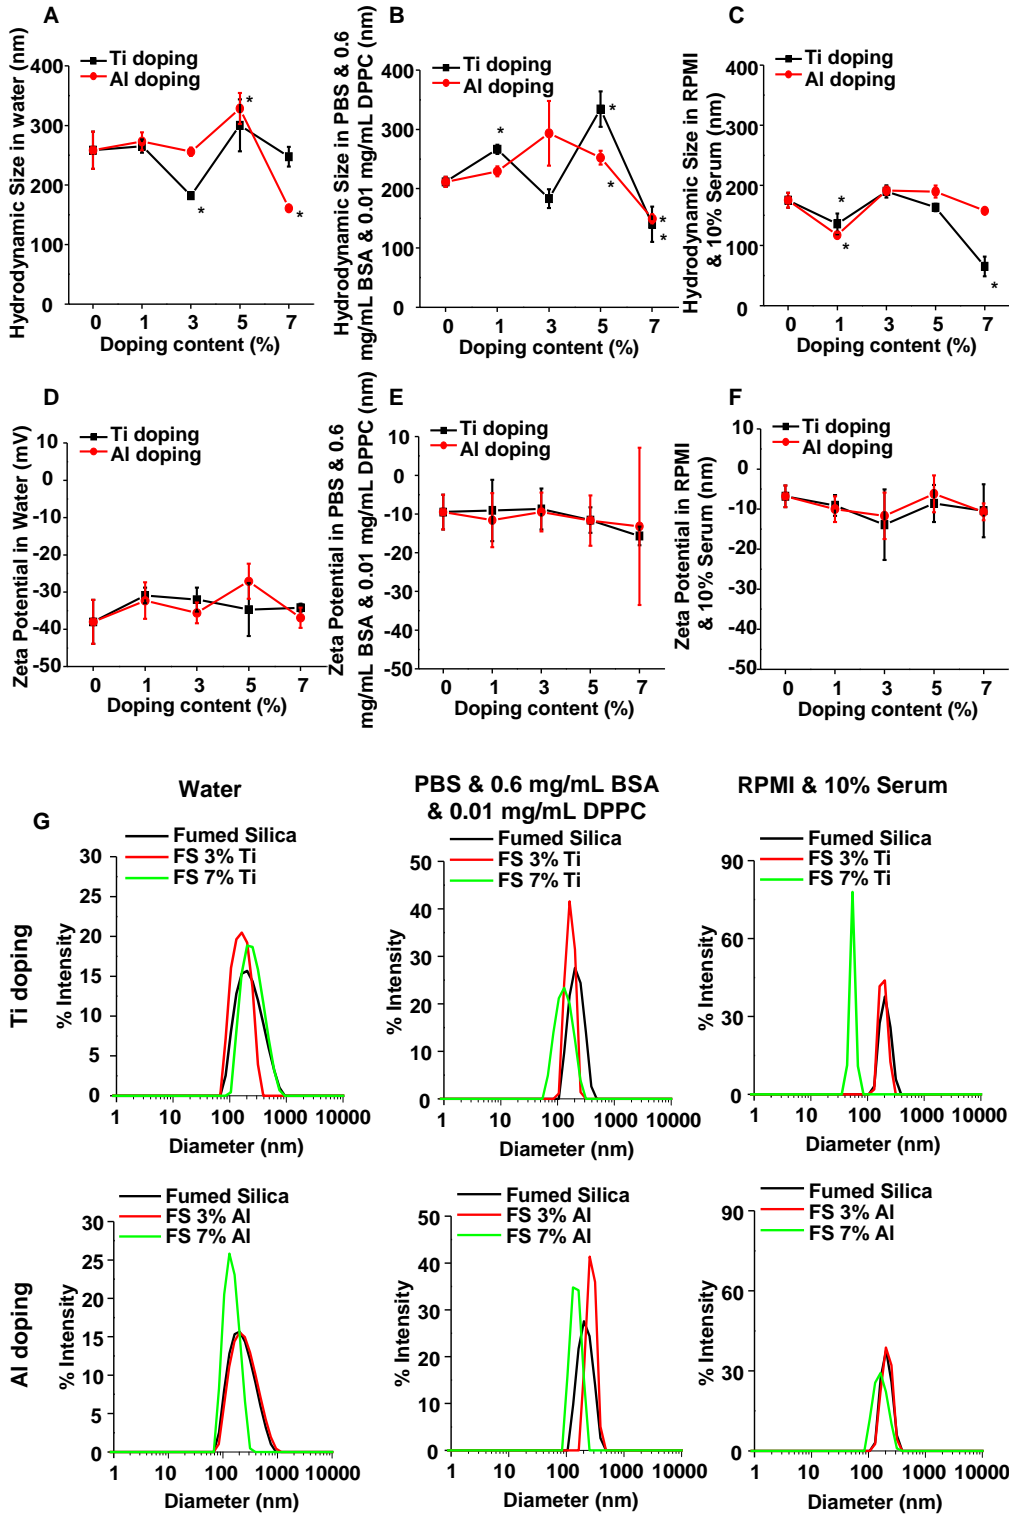

**Figure S2. Hydrodynamic size and  $\zeta$ -potential of pristine and doped fumed silica.**

Hydrodynamic size of pristine and doped fumed silica in (A) water, (B) PBS&0.6 mg/mL BSA&0.01 mg/ml DPPC, and (C) RPMI&10% serum. Zeta potential of pristine and doped fumed silica in (D) water, (E) PBS&0.6 mg/mL BSA&0.01 mg/ml DPPC, and (F) RPMI&10% serum. (G) Size distribution of pristine and doped fumed silica in various exposure media.

Figure S3

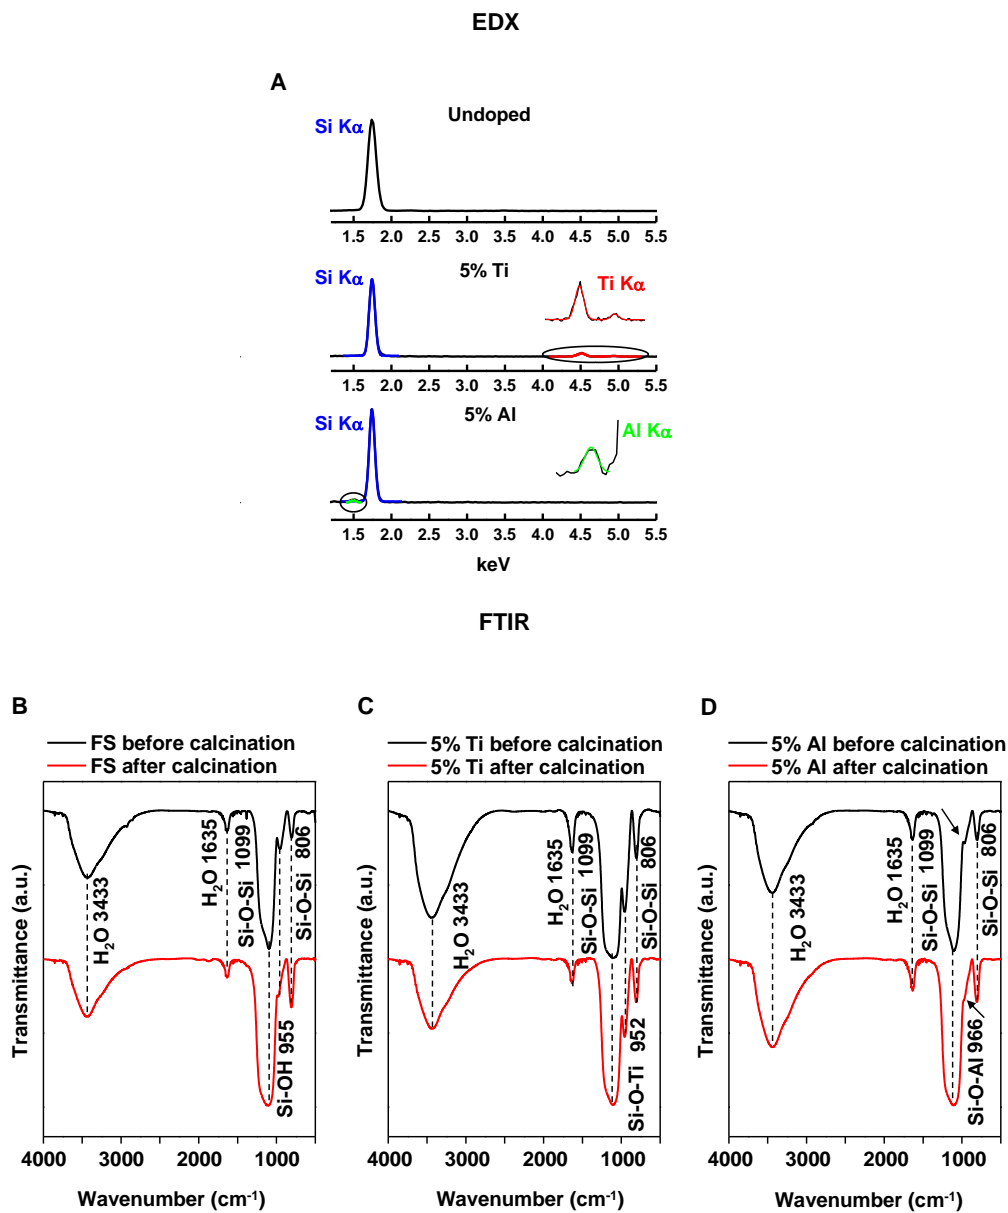

**Figure S3. Physicochemical characterization of fumed silica nanoparticles.** (A) EDX and (B-D) FTIR analysis of non-doped and 5% Ti- or Al-doped fumed silica nanoparticles before and after calcination at 800 °C for 6 h.

Figure S4

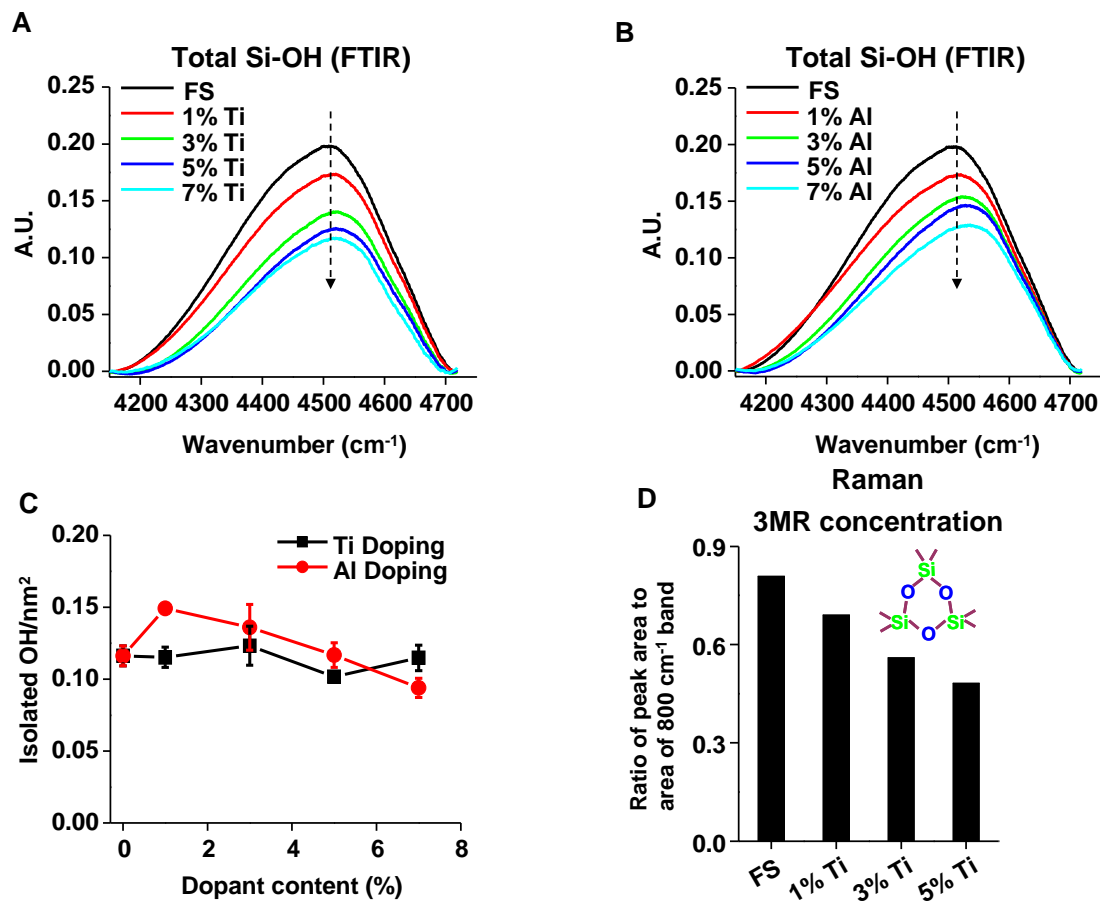

**Figure S4. Decrease in total silanol density and concentration of strained three-membered rings (3MR) in doped fumed silica nanoparticles.** (A-B) FTIR spectra showing the total silanol density in doped fumed silica nanoparticles. (C) Isolated silanol density in fumed silica nanoparticles. (D) 3MR concentration in Ti-doped fumed silica nanoparticles obtained from peak fitting of Raman data and normalization to the 800 cm<sup>-1</sup> band attributable to the total siloxane content.

Figure S5

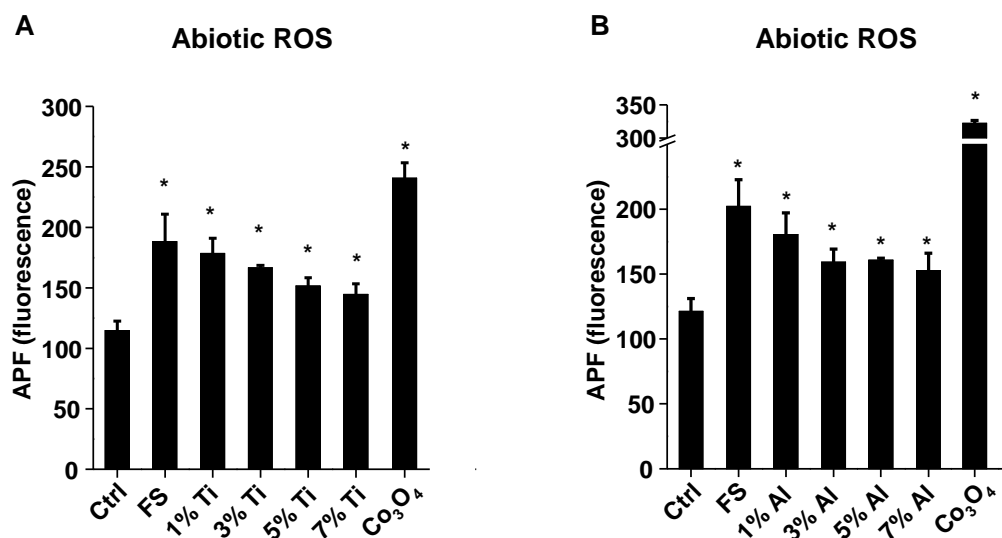

**Figure S5. Abiotic ROS generation by fumed silica nanoparticles.** Hydroxyl radical generation by (A) Ti- and (B) Al-doped fumed silica nanoparticles was determined by the APF. 100  $\mu\text{g}/\text{ml}$  of non-doped and doped fumed silica nanoparticles were incubated with 10  $\mu\text{mol}/\text{L}$  of APF (in PBS) in a volume of 100  $\mu\text{L}$  in a 96-well plate at room temperature for 6 h. Fluorescence was collected at 514 nm with an excitation wavelength of 455 nm in a microplate reader. \*  $p < 0.05$  compared to particle-free control.

**Figure S6**

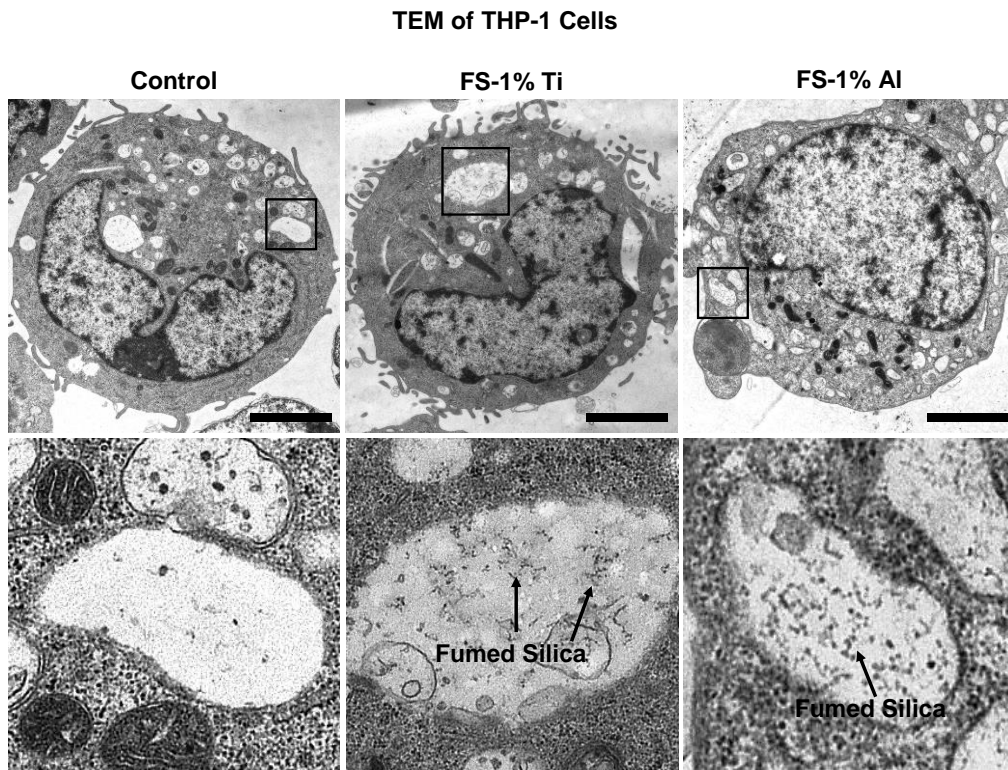

**Figure S6. Cellular uptake and intracellular distribution of doped fumed silica in THP-1 cells.** TEM analysis of THP-1 cells exposed to doped fumed silica nanoparticles. THP-1 cells were exposed to doped fumed silica for 12 h. The images were taken with a JEOL 100CX electron microscope at 80 kV. The scale bar is 5  $\mu$ m.



**Figure S7**

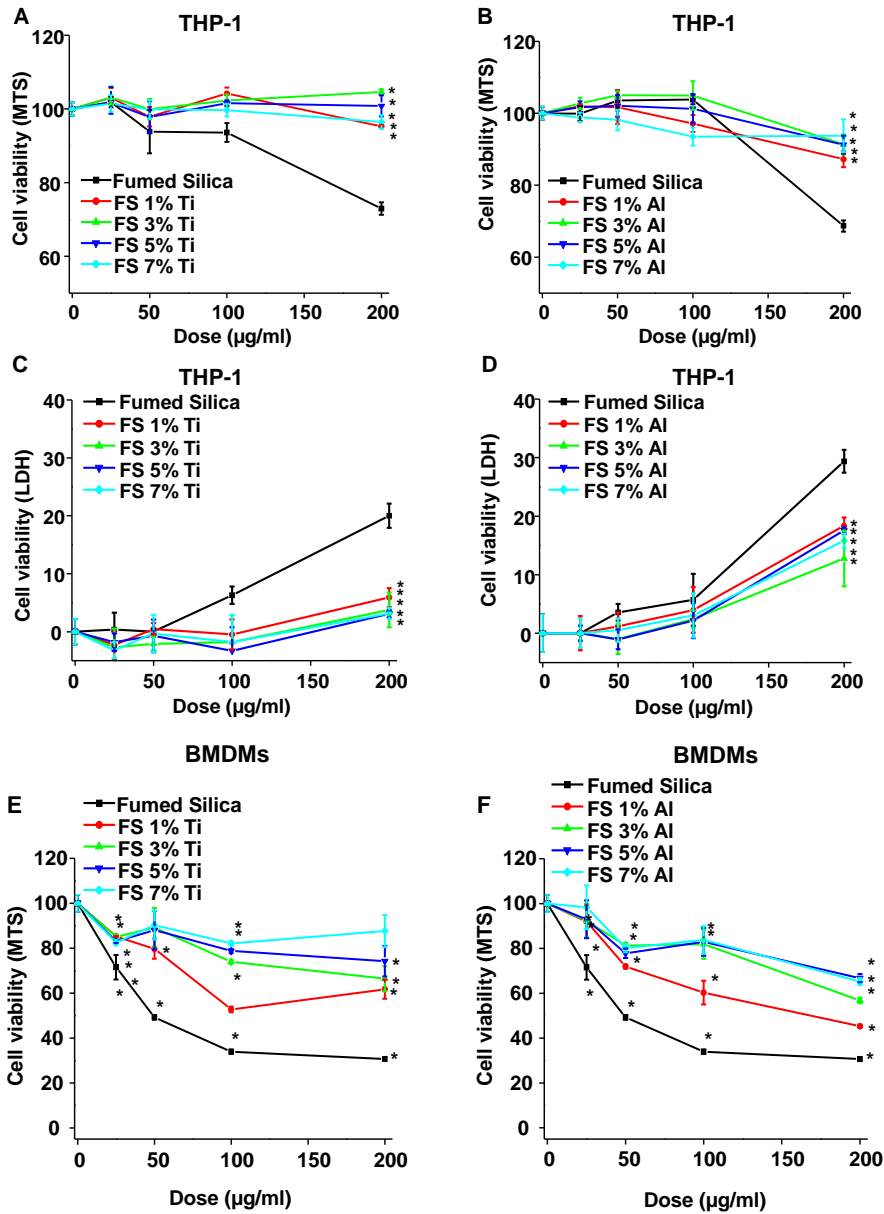

**Figure S7. Doping attenuates fumed silica induced cell death of THP-1 cells and BMDMs.** (A-B) Cell viability of THP-1 cells after exposure to fumed silica nanoparticles for 24 h was determined using a MTS assay. The cell viability of the fumed silica-treated cells was normalized to the value of non-treated control cells, for which the viability was regarded as 100%. \*  $p < 0.05$  compared to non-doped fumed silica-treated cells. (C-D) Cell

death of THP-1 cells after exposure to fumed silica nanoparticles for 24 h was determined using a LDH assay. The cell death of the fumed silica-treated cells was normalized to the value of non-treated control cells, for which the LDH level was regarded as zero. \*  $p < 0.05$  compared to non-doped fumed silica-treated cells. (E-F) Cell viability of BMDMs after exposure to fumed silica nanoparticles for 24 h was determined using a MTS assay. The cell viability of the fumed silica-treated cells was normalized to the value of non-treated control cells, for which the viability was regarded as 100%. \*  $p < 0.05$  compared to non-doped fumed silica-treated cells.

Figure S8

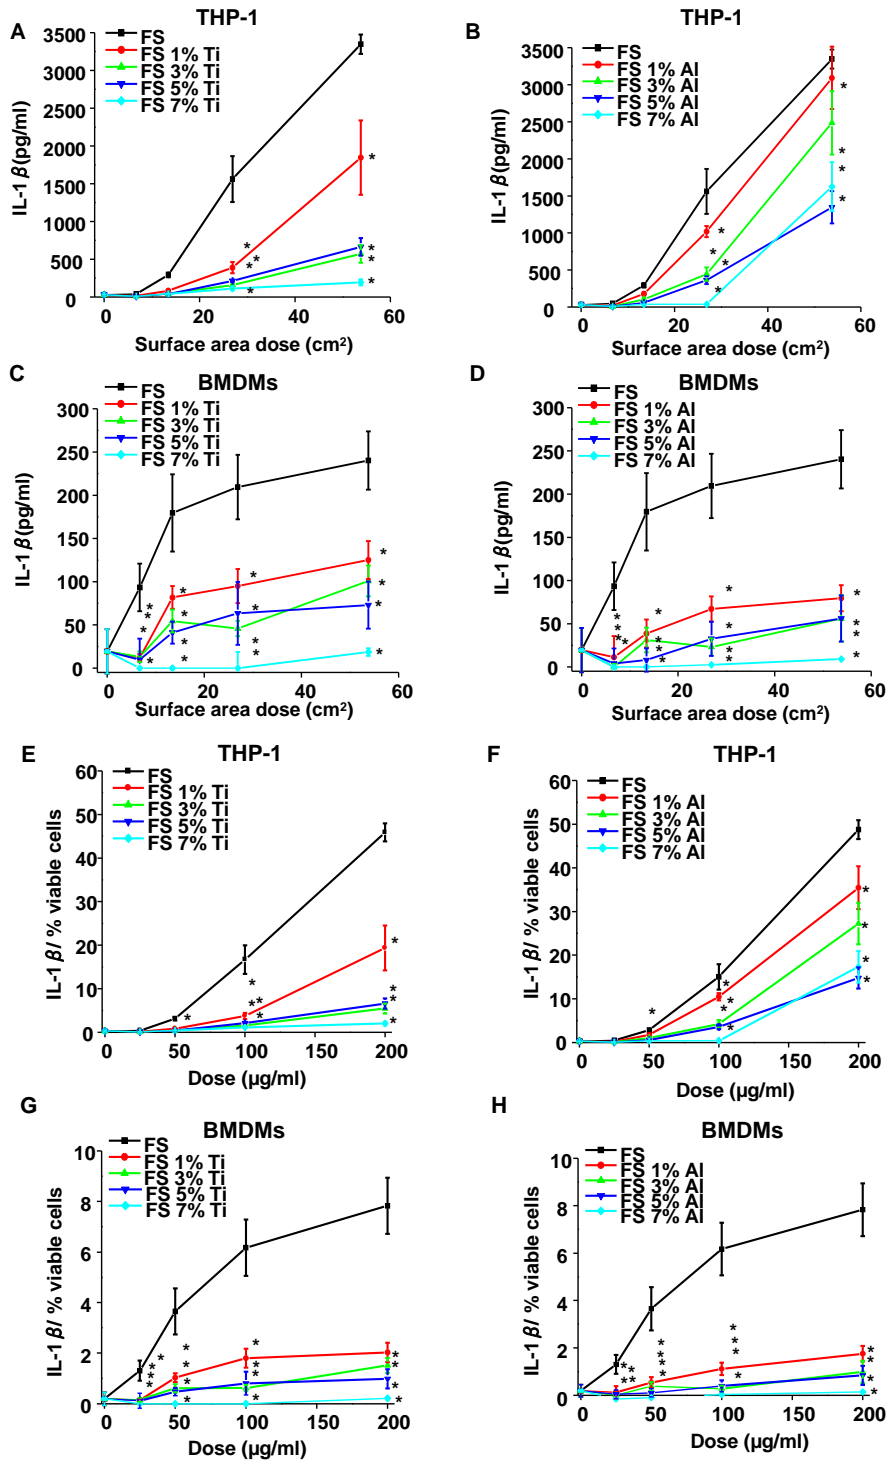

**Figure S8. Reduction in IL-1 $\beta$  production by Ti and Al doping of fumed silica nanoparticles.** IL-1 $\beta$  production induced by doped fumed silica in (A-B) THP-1 cells and (C-D) BMDMs is plotted as a function of dose expressed as the surface area of the respective fumed silica samples. Naive THP-1 cells were treated with PMA (1  $\mu\text{g}/\text{mL}$ ) for 16 h. Then PMA-differentiated THP-1 cells were exposed to 6.7-53.8  $\text{cm}^2$  of (A) Ti-doped and (B) Al-doped fumed silica nanoparticles for 24 h in the presence of LPS (10  $\text{ng}/\text{mL}$ ). (C-D) IL-1 $\beta$  production induced by doped fumed silica in bone marrow-derived macrophages (BMDMs). BMDMs obtained from wild type C57BL/6 mice were exposed to 6.7-53.8  $\text{cm}^2$  of (C) Ti-doped and (D) Al-doped fumed silica nanoparticles for 24 h in the presence of LPS (500  $\text{ng}/\text{mL}$ ). IL-1 $\beta$  production was quantified by ELISA. \*  $p < 0.05$  compared to non-doped fumed silica. (E-H) IL-1 $\beta$  production was normalized according to the percentage of viable cells (MTS assay). (E-F) IL-1 $\beta$  production in THP-1 cells after (E) Ti doping or (F) Al doping. (G-H) IL-1 $\beta$  production in BMDMs after (G) Ti doping or (H) Al doping. IL-1 $\beta$  production was quantified by ELISA, cell viability was determined by MTS. \*  $p < 0.05$  compared to non-doped fumed silica.

Figure S9

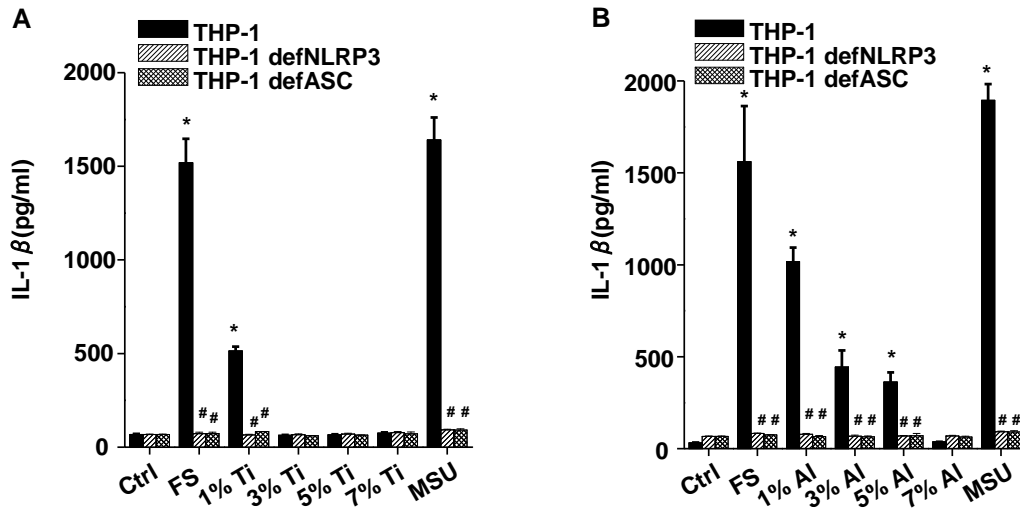

**Figure S9. Fumed silica induced IL- $\beta$  production is NLRP3 inflammasome dependent and is attenuated by Ti and Al doping.** Naive THP-1, THP-1 defNLRP3 and THP-1 defASC cells were treated with PMA (1  $\mu$ g/mL) for 16 h to induce differentiation. PMA-differentiated cells were exposed to (A) Ti-doped and (B) Al-doped fumed silica nanoparticles at 100  $\mu$ g/mL for 24 h in the presence of LPS (10 ng/mL). IL-1 $\beta$  production was quantified by ELISA. \* $p$ <0.05 compared to control cells (PMA-differentiated, in the presence of LPS). # $p$ <0.05 compared to same particle-treated wild type THP-1 cells (PMA-differentiated, in the presence of LPS).

Figure S10

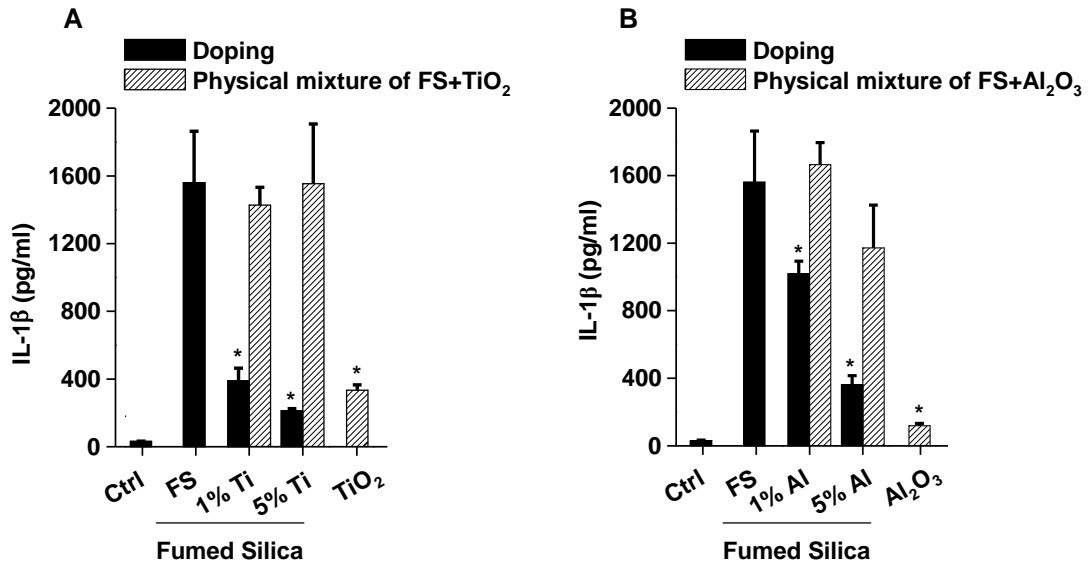

**Figure S10. Physical mixing of fumed silica with TiO<sub>2</sub> or Al<sub>2</sub>O<sub>3</sub> nanoparticles has no effect on IL-1 $\beta$  production.** (A-B) THP-1 cells were treated by (A) Ti-doped and (B) Al-doped fumed silica nanoparticles (100  $\mu$ g/ml) and the results were compared to cells treated by physical mixtures of fumed silica with (A) TiO<sub>2</sub> or (B) Al<sub>2</sub>O<sub>3</sub> nanoparticles for 24 h. IL-1 $\beta$  production was quantified by ELISA. \* p < 0.05 compared to non-doped fumed silica.

**Figure S11**

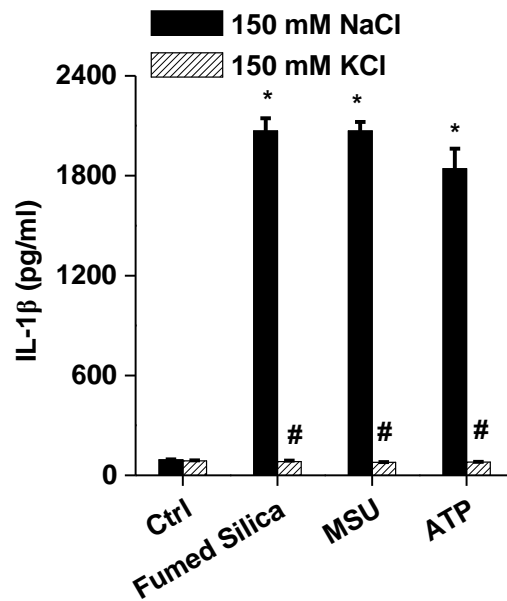

**Figure S11. Fumed silica-induced IL-1 $\beta$  production is dependent on potassium efflux.** THP-1 cells were treated with fumed silica (100  $\mu$ g/ml), MSU (100  $\mu$ g/ml) and ATP (5 mM) in serum-free buffer containing either 150 mM NaCl or 150mM KCl. IL-1 $\beta$  production was quantified by ELISA. \*  $p < 0.05$  compared to control cells without particle treatment; #  $p < 0.05$  compared to THP-1 cells of same particle treatment.

Table S1 Hydrodynamic Size and  $\zeta$ -Potential of Nanoparticles Used in This Study.

|                                | hydrodynamic size (nm) |                                            |                           | $\zeta$ -potential (mV) |                                            |                           |
|--------------------------------|------------------------|--------------------------------------------|---------------------------|-------------------------|--------------------------------------------|---------------------------|
|                                | Water                  | PBS&0.6<br>mg/mL<br>BSA&0.01<br>mg/ml DPPC | RPMI<br>1640&10%<br>serum | Water                   | PBS&0.6<br>mg/mL<br>BSA&0.01<br>mg/ml DPPC | RPMI<br>1640&10%<br>serum |
| TiO <sub>2</sub>               | 601.9±26.2             | 985.8±55.1                                 | 651.0±42.7                | 12.8±3.6                | -14.5±4.8                                  | -8.8±5.7                  |
| Al <sub>2</sub> O <sub>3</sub> | 322.9±14.3             | 801.4±66.8                                 | 369.7±30.7                | 38.0±0.8                | -4.0±10.3                                  | -10.5±5.3                 |



Table S2 Dosimetry Calculations

---

**Calculated fumed silica deposition (mass) during occupational exposure to 10.5 [mg/m<sup>3</sup>] in a working facility<sup>1</sup>**

---

**1. Calculated monthly SiO<sub>2</sub> deposition (mass) at peak exposure**

*Assumptions:*

Ventilation rate of a healthy human adult: [20 L/min]

Deposition fraction: 30%

Monthly exposure period: 8 [h/day], 5 [day/week], 4 weeks

*Calculation of monthly deposition:*

$$\frac{10.5\text{mg}}{\text{m}^3} \times \frac{20\text{L}}{\text{min} \cdot \text{person}} \times 30\% \times \frac{60\text{min}}{\text{hour}} \times \frac{8\text{hour}}{\text{day}} \times \frac{5\text{day}}{\text{week}} \times \frac{4\text{weeks}}{\text{month}} \times \frac{\text{m}^3}{1000\text{L}} = 604.8 \text{mg} / \text{person}$$

**2. Monthly deposition level (mass/surface area) in a human worker**

*Assumptions:*

Human alveolar surface area: 102 [m<sup>2</sup>/person]

*Calculation:*

$$\frac{604.8\text{mg}}{\text{person}} \times \frac{\text{person}}{102\text{m}^2} \times \frac{1000\mu\text{g}}{\text{mg}} = 5929.4 \mu\text{g} / \text{m}^2$$

**3. Comparable deposition level in a mouse receiving a one-time installation**

*Assumptions:*

Alveolar epithelium surface area of a mouse: [0.05 m<sup>2</sup>/mouse]

Weight of a mouse: 25 [g]

*Calculation:*

$$\frac{5929.4\mu\text{g}}{\text{m}^2} \times \frac{0.05\text{m}^2}{\text{mouse}} \times \frac{1\text{mg}}{1000\mu\text{g}} \times \frac{\text{mouse}}{25\text{g}} \times \frac{1000\text{g}}{\text{kg}} = 11.9 \text{mg} / \text{kg}$$

---

## EXPERIMENTAL SECTION

**Cell Culture.** Human THP-1 cells were grown in RPMI-1640 media supplemented with 10% (vol/vol) of fetal bovine serum (FBS), 100 U/mL-100 µg/mL of Penicillin-Streptomycin and 50 µM of beta-mercaptoethanol. The passage number of THP-1 cells was maintained between 3 and 10. BMDMs were prepared from the bone marrow of female *wt* C57BL/6 mice. Briefly, femurs and tibia were cut at both ends and the marrow cavity was flushed with DMEM medium using a 5-mL syringe with a 25-G needle. The cell suspension was repeatedly aspirated with a 10-mL pipet to disperse the clumps and then passed through a 70-µm cell strainer. Cells were spin down at 400 g for 10 min at 4 °C, and resuspended in 1 mL of ice-cold 25% LADMAC conditioned medium. The cell concentration was adjusted to  $10^6$  cells/mL in 25% LADMAC conditioned media, and cells were plated in 100 mm petri dish. Cells were maintained for seven days at 37 °C. The media was replaced with fresh 25% LADMAC conditioned media every two days. After seven days, cells were dissociated from the plate using trypsin and re-plated at  $5 \times 10^4$  cells/well in complete DMEM medium in a 96-well flat-bottom tissue culture plate. The bone marrow-derived macrophages (BMDMs) were treated with 10 ng/mL of recombinant murine IFN- $\gamma$  for 48 h prior to use.

**Determination of the Abiotic Hydroxyl Radical Generation in Fumed Silica Nanoparticles.** Abiotic hydroxyl radical generation by fumed silica nanoparticles was determined by the increased fluorescence of 3'-(p-aminophenyl) fluorescein (APF), which predominantly reacts with hydroxyl radicals. 96 µL of a 10 µmol/L APF suspension in PBS was added to each well of a black 96-well plate (Costar, Corning, NY). 2 µL of 5 mg/mL nanoparticle suspension was subsequently added to each well and

mixed well. Following 6 h incubation, the emission of APF fluorescence was collected at 480-600 nm with an excitation wavelength of 455 nm in a SpectraMax M5 microplate reader (Molecular Devices, Sunnyvale, CA).

**Determination of Cytotoxicity of Fumed Silica Nanoparticles in THP-1 cells.** The cytotoxicity of fumed silica nanoparticles in THP-1 cells was determined by a MTS assay using CellTiter 96 AQueous (Promega Corporation, WI). After 24 h exposure to fumed silica nanoparticles in a 96-well plate, the cell culture medium was removed and replenished with 120  $\mu$ L of complete cell culture media containing 16.7% of MTS stock solution for an one hour at 37  $^{\circ}$ C. The plate was centrifuged at 2000g for 10 min in an Eppendorf 5430 microcentrifuge with microplate rotor to spin down the cell debris and nanoparticles. 100  $\mu$ L of the supernatant was removed from each well and transferred into a new 96-well plate. The absorbance of formed formazan was read at 490 nm on a SpectraMax M5 microplate reader (Molecular Devices, Sunnyvale, CA). The cytotoxicity of fumed silica nanoparticles in THP-1 cells was also assessed by the LDH assay using CytoTox 96 Non-Radioactive Cytotoxicity Assay (Promega Corporation, WI). After 24 h exposure to fumed silica nanoparticles in a 96-well plate, 10  $\mu$ L of Lysis Solution was added to each well. The plate was subsequently incubated for one hour at 37  $^{\circ}$ C and 5% CO<sub>2</sub>. Following centrifugation at 250 g for 4 min, 50  $\mu$ L of cell lysate was mixed with 50  $\mu$ L of reconstituted Substrate Mix, and was incubated at room temperature for 30 min. 50  $\mu$ L of Stop Solution was added to each well and the absorbance was read at 490 nm on a SpectraMax M5 microplate reader (Molecular Devices, Sunnyvale, CA).

**Cellular Uptake Determined by Transmission Electron Microscopy (TEM).** Differentiated THP-1 cells were treated with fumed silica nanoparticles for 12 h. The

cells was collected and washed with PBS. The cells were treated with 2.5 % of glutaraldehyde (in PBS) for 2 h at room temperature. After fixation in 1% of OsO<sub>4</sub> in PBS for 1 h, the cells were dehydrated in a graded ethanol series, treated with propylene oxide, and embedded in Epon. Approximately 60–70 nm thick sections were prepared on a Reichert-Jung Ultracut E ultramicrotome and placed on Formvar-coated copper grids. The sections were stained with uranyl acetate and Reynolds lead citrate and examined on a JEOL 100CX electron microscope at 80 kV in the UCLA BRI Electron Microscopy Core.

**Determination of Cell Membrane Potential.** Cell membrane potential in THP-1 cells after fumed silica exposure was determined using the FLIPR assay kit (Molecular Devices, Sunnyvale, CA). Briefly, differentiated THP-1 cells were exposed to fumed silica for 1h, following which the cells were loaded with FLIPR reagent (100 µl/well, red) for 30 min at 37 °C. The fluorescence was measured at Excitation530/Emission565 using a SpectraMax M5 microplate reader (Molecular Devices, Sunnyvale, CA).

**Determination of Intracellular GSH Content.** A GSH-Glo assay kit (Promega, Madison, WI) was used to determine the intracellular GSH levels after fumed silica exposure. The THP-1 cells were exposed to fumed silica (100 µg/mL) in a 96-well plate at 37 °C and 5% CO<sub>2</sub> for the indicated time. After exposure, the cellular supernatant was removed and 100 µL of GSH-Glo reaction buffer containing Luciferin-NT and glutathione S-transferase was added to each well and incubated at room temperature with constant shaking for 30 min. Subsequently, 100 uL of Luciferin D detection reagent was added to each well and the plate was incubated at room temperature with constant

shaking for another 15 min. The luminescent signal was quantified using a SpectraMax M5 microplate reader (Molecular Devices; Sunnyvale, CA).

#### **REFERENCES AND NOTES**

1. Choudat, D.; Frisch, C.; Barrat, G.; el Kholti, A.; Conso, F., Occupational Exposure to Amorphous Silica Dust and Pulmonary Function. *Br. J. Ind. Med.* **1990**, 47, 763-766.
